# Supplementary material for: A comprehensive approach to the molecular determinants of lifespan using a Boolean model of geroconversion
Source: PubMed Central journal article supplement (PMC6398530; doi:10.1111/acel.12504), 2016-09-09
Supplement: ACEL-15-1018-s001.pdf [file ACEL-15-1018-s001.pdf]

PBMC

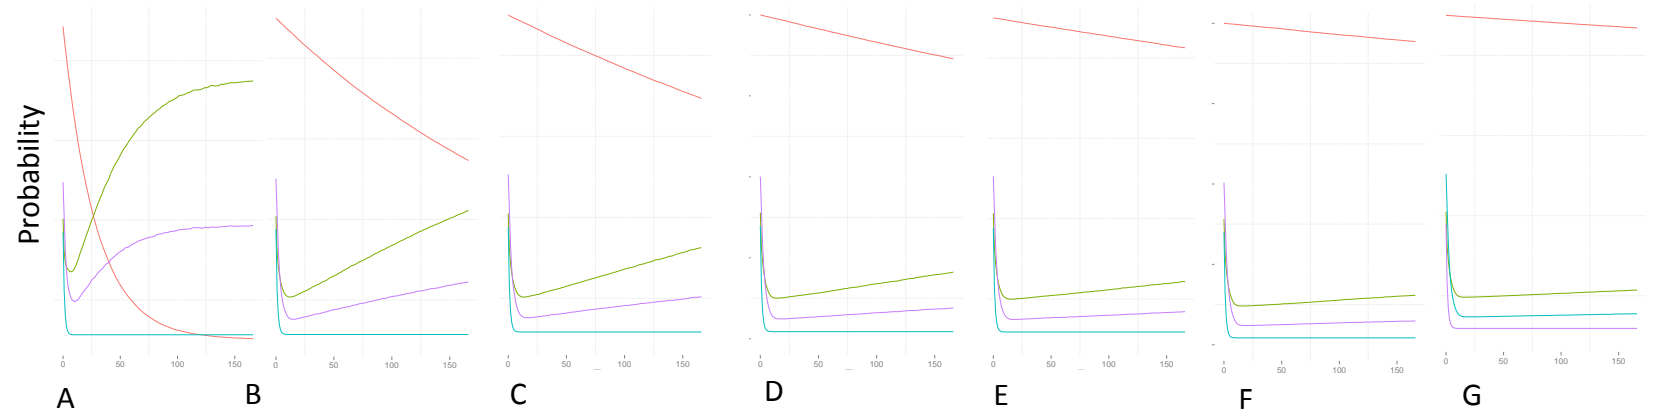

Pancreatic tumors

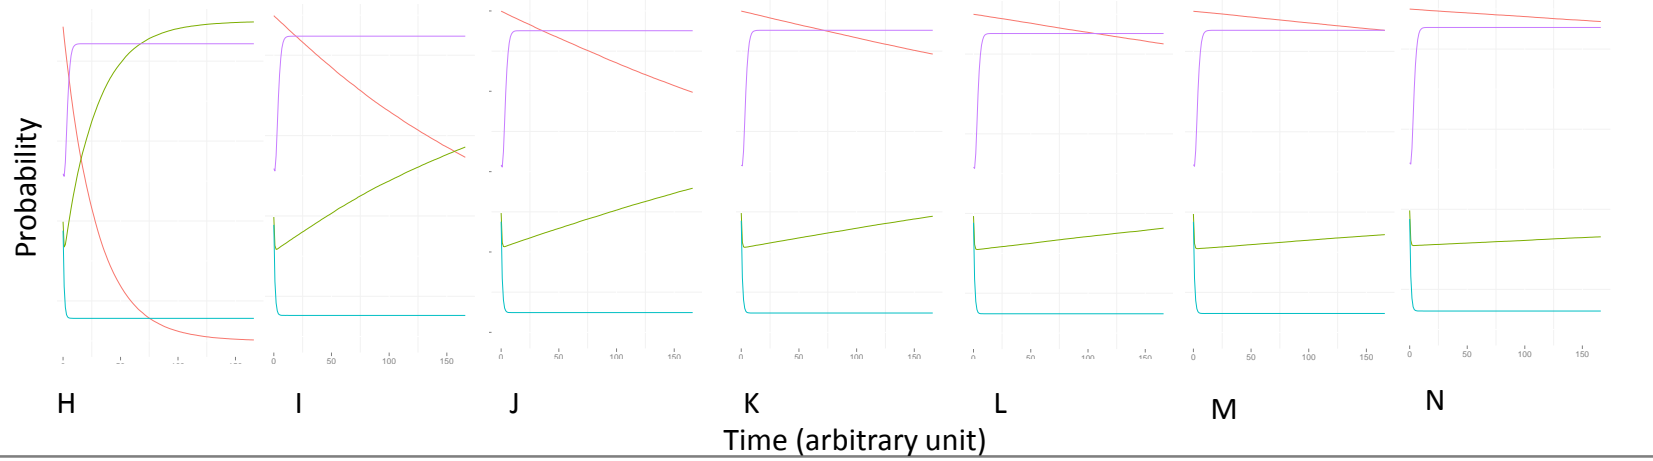

Time (arbitrary unit)

- Therapy
- mTORC1\_S6K1
- Senescence
- G1\_S
