# Supplementary material for: A comprehensive approach to the molecular determinants of lifespan using a Boolean model of geroconversion
Source: PubMed Central journal article supplement (PMC6398530; doi:10.1111/acel.12504), 2016-09-09
Supplement: ACEL-15-1018-s002.pdf [file ACEL-15-1018-s002.pdf]

Single dose

Probability

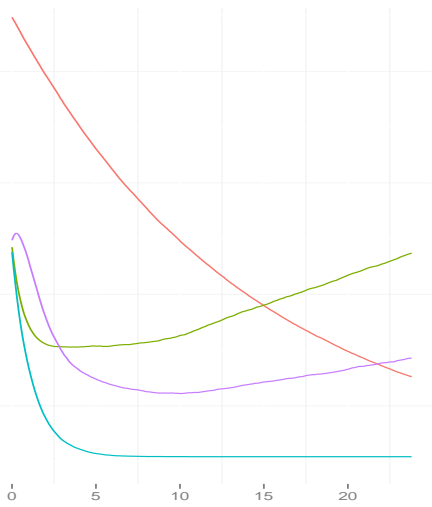

B

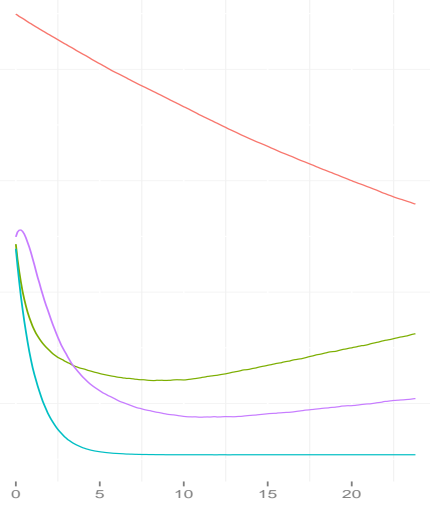

C

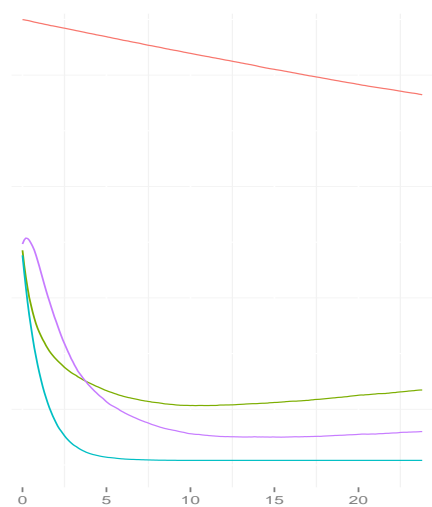

Daily dosage

Probability

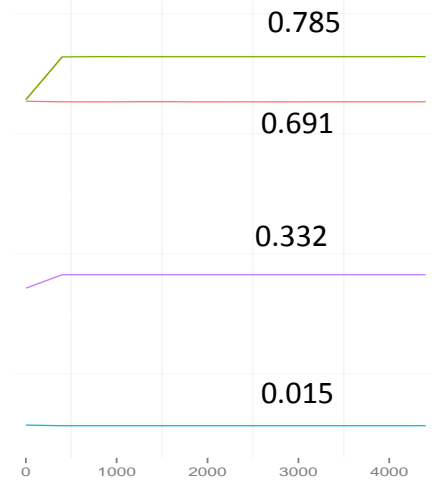

E

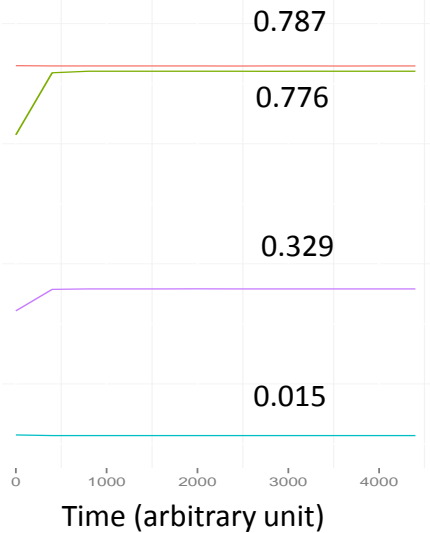

F

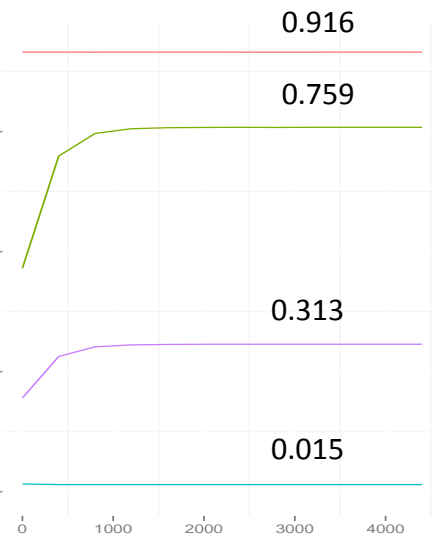

- Therapy
- mTORC1\_S6K1
- Senescence
- G1\_S
