# Supplementary material for: A comprehensive approach to the molecular determinants of lifespan using a Boolean model of geroconversion
Source: PubMed Central journal article supplement (PMC6398530; doi:10.1111/acel.12504), 2016-09-09

# Relation between dose and toxicity

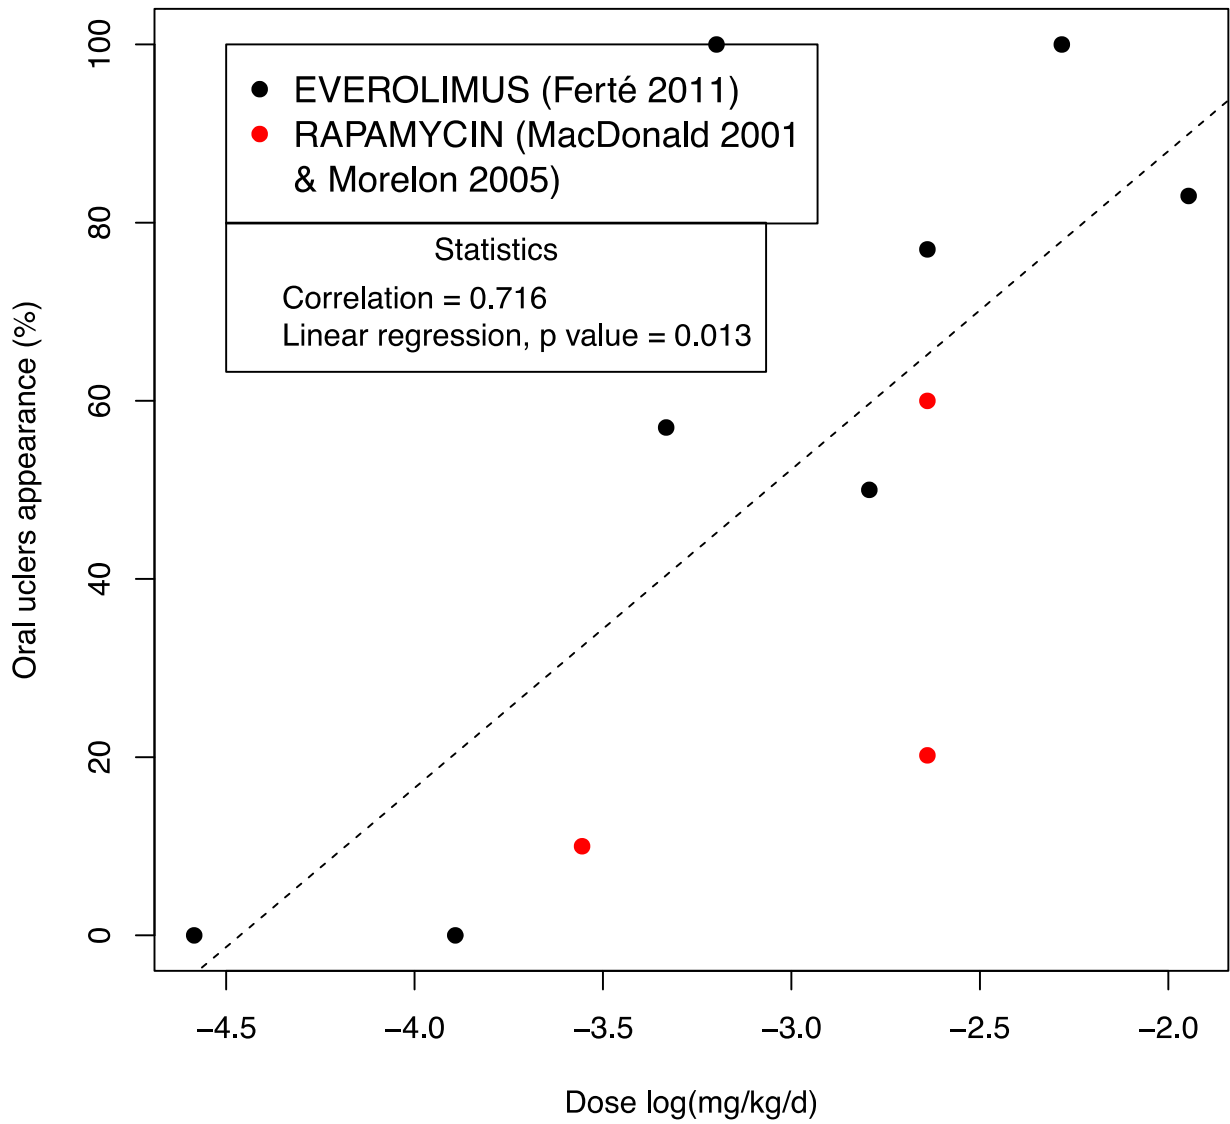

Supplement: ACEL-15-1018-s005.pdf [file ACEL-15-1018-s005.pdf]
