# Supplementary material for: A comprehensive approach to the molecular determinants of lifespan using a Boolean model of geroconversion
Source: PubMed Central journal article supplement (PMC6398530; doi:10.1111/acel.12504), 2016-09-09

**A** Predicted percentage of oral toxicity vs predicted dT

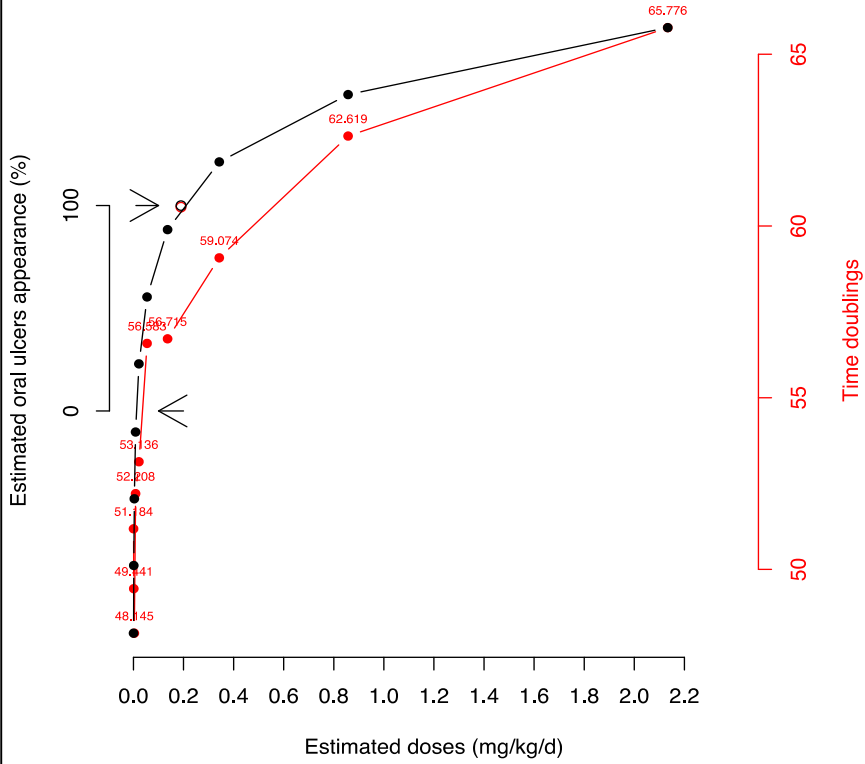

**B** Toxicity of mTOR inhibitors and doubling times

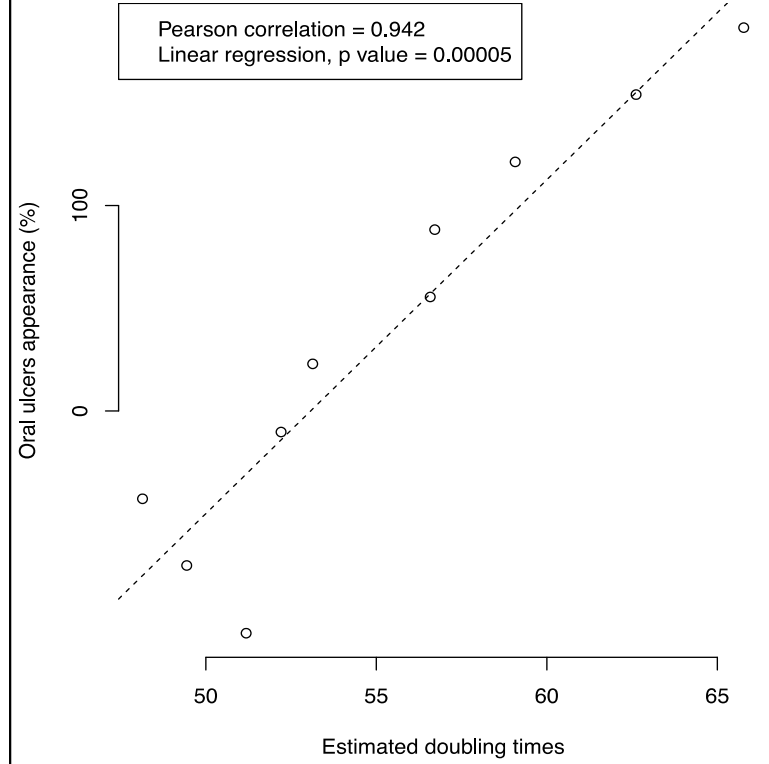

Supplement: ACEL-15-1018-s006.pdf [file ACEL-15-1018-s006.pdf]
