# Supplementary material for: A comprehensive approach to the molecular determinants of lifespan using a Boolean model of geroconversion
Source: PubMed Central journal article supplement (PMC6398530; doi:10.1111/acel.12504), 2016-09-09

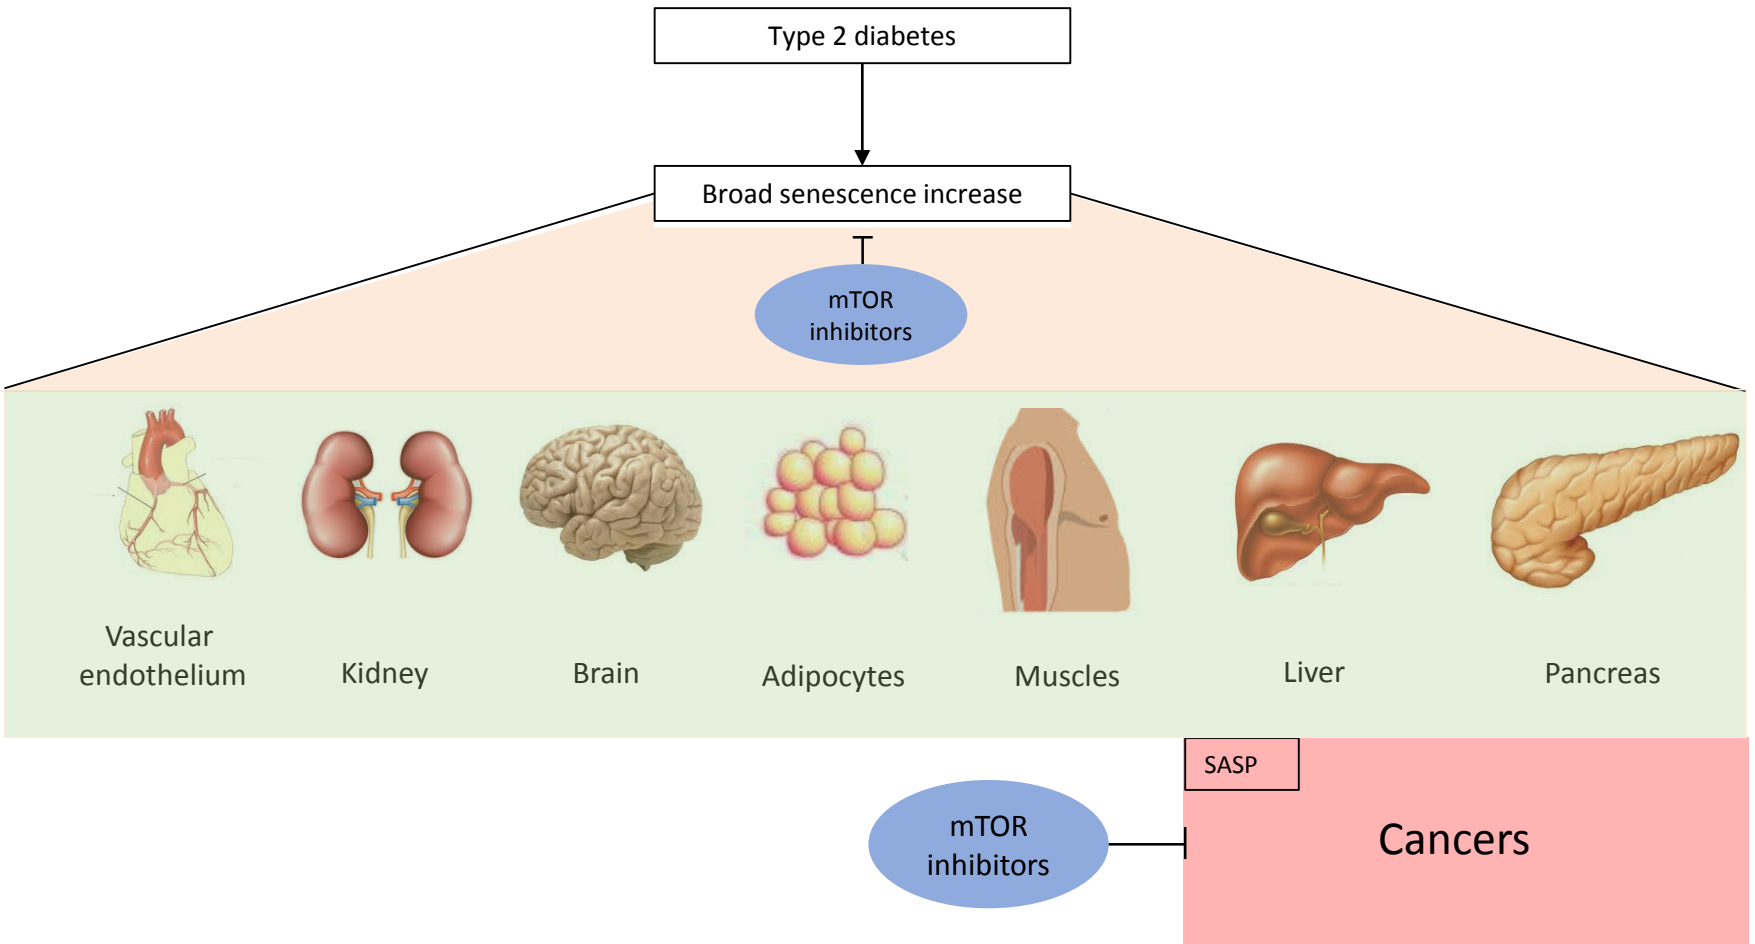

Supplement: ACEL-15-1018-s008.pdf [file ACEL-15-1018-s008.pdf]
